# Supplementary material
Source: publisher figshare collection journal article supplement (https://acs.figshare.com/ndownloader/files/14732402)
Supplement: Supplementary file 1 [file 14732402]

## Sheet: Sheet1
Table S-1: Demonstration for the enrichment specificity of SiLAP strategy using E. coli proteome digest as a complex background.

## Sheet: direct analysis
Centroid Mass	Lower Bound	Upper Bound	Charge (z)	Height	Relative Intensity	Area	S/N Ratio	Resolution	Isotope Cluster Area
1301.02	1300.86	1301.34	1	188	2.95	1738.74	14.94	6975.08	3826.05
1303.03	1302.68	1303.26	1	123	1.93	1550.89	10.86	6442.02	996.56
1306	1305.72	1306.28	1	123	1.93	1625.23	10.77	6836.28	2143.58
1308.03	1307.67	1308.27	1	127	2	1661.04	10.67	5897.31	1618.07
1310.01	1309.81	1310.39	1	184	2.88	1890.54	15.01	9430.23	2658.31
1316.09	1315.66	1316.43	1	533	8.36	7066.16	44.18	5534.6	16041.1
1319.07	1318.79	1319.33	1	133	2.09	1741.69	10.26	5427.33	1768.84
1320.04	1319.63	1320.35	1	231	3.62	2266.13	18.41	7257.53	3209.64
1322	1321.77	1322.36	1	144	2.25	2016.89	11.9	6013.23	2067.01
1327.06	1326.79	1327.35	1	817	12.81	6377.26	66.56	11036.8	15244
1329.05	1328.76	1329.35	1	374	5.86	3784.63	31.15	7918.26	2847.63
1330.09	1329.6	1330.32	1	438	6.86	4224.63	36.28	9320.84	5695.53
1331.07	1330.52	1331.36	1	379	5.94	4358.59	31.77	8413.67	3890.31
1333.06	1332.83	1333.34	1	132	2.07	1569.43	10.84	6626.49	1430.57
1334.04	1333.77	1334.39	1	170	2.66	1839.11	14.14	6766.83	2475
1336.03	1335.75	1336.28	1	140	2.2	1577.15	11.5	6545.93	1679.96
1341.08	1340.71	1341.44	1	155	2.43	2162.4	13.51	7468.49	2578.31
1344.08	1343.83	1344.36	1	171	2.68	1268.03	12.83	11481.4	2429.77
1345.04	1344.86	1345.37	1	130	2.03	1438.34	10.3	6625.71	1238.37
1346.09	1345.74	1346.37	1	144	2.26	2108.94	12.72	5868.62	3152.54
1347.09	1346.84	1347.47	1	209	3.28	2754.29	17.02	6220.62	3249.29
1348.09	1347.79	1348.44	1	212	3.32	2488.92	17.4	6047.96	1700.75
1349.08	1348.81	1349.5	1	472	7.4	5254.38	39.32	8049.29	9930.28
1352.06	1351.85	1352.4	1	191	3	2043.72	15.02	9540.13	2168.72
1358.06	1357.73	1358.36	1	170	2.66	2308.06	14.48	6056.21	5821.46
1360.08	1359.92	1360.48	1	137	2.15	1629.12	10.97	7538.44	1526.48
1361.06	1360.83	1361.29	1	119	1.87	1402.59	10.02	5905.62	1299.64
1362.05	1361.82	1362.46	1	170	2.66	1850.04	13.61	8656.24	2644.66
1363.06	1362.46	1363.29	1	145	2.28	2130.78	10.94	5761.7	2178.03
1364.08	1363.72	1364.3	1	154	2.42	1941.37	12.08	6508.2	1530.04
1365.09	1364.87	1365.41	1	155	2.43	1600.34	11.69	7728.27	1259.42
1366.07	1365.88	1366.42	1	171	2.69	1653.32	12.46	7343.1	1956.62
1367.1	1366.85	1367.31	1	293	4.6	2273.67	22.2	8326.6	3127.48
1368.11	1367.75	1368.4	1	263	4.13	3190.66	21.6	6922.5	4084.13
1369.08	1368.76	1369.51	1	236	3.7	3629.73	20	4803.21	3504.81
1370.08	1369.73	1370.58	1	285	4.48	3442.47	23.69	8011.19	2460.93
1373.01	1372.61	1373.38	1	453	7.1	4205.78	37.05	8842.53	9584.47
1375.04	1374.66	1375.35	1	198	3.1	3096.1	16.67	5162.41	2600.05
1376.07	1375.69	1376.35	1	160	2.5	2409.82	13.03	4552.8	1471.73
1379.08	1378.89	1379.27	1	136	2.13	1161.66	10.34	8204.38	2221.7
1380.08	1379.89	1380.31	1	212	3.33	1599.75	16.21	9382.28	1803.39
1381.1	1380.73	1381.34	1	206	3.23	2836.37	17.12	6907.17	3547.3
1392.06	1391.89	1392.43	1	134	2.1	1437.84	11	7154.19	2379.45
1394.08	1393.75	1394.43	1	241	3.77	2791.19	20.66	7387.02	5331.91
1396.08	1395.71	1396.49	1	165	2.58	1821.78	13.77	8955.88	2017.92
1397.11	1396.79	1397.39	1	135	2.12	2067.57	11.53	5685.62	2351.89
1398.07	1397.68	1398.52	1	231	3.62	3354.3	19.54	6697.65	3733.49
1405.15	1404.76	1405.38	1	301	4.72	3377.08	25.46	7694.53	8204.51
1407.16	1406.81	1407.54	1	292	4.58	3972.35	24.45	6568.36	3376.02
1409.1	1408.84	1409.37	1	164	2.57	1816.23	12.16	5541.68	1788.56
1410.08	1409.93	1410.33	1	244	3.83	1760.62	17.92	9081.26	1961.55
1411.13	1410.47	1411.48	1	394	6.18	5470.41	31.66	6436.51	10672.5
1413.11	1412.75	1413.46	1	294	4.61	3827.88	24.23	6406.32	4402.46
1414.1	1413.88	1414.55	1	277	4.35	3283.48	20.01	7003.81	2515.06
1416.1	1415.76	1416.38	1	184	2.89	1499.85	13.85	9940.63	1170.88
1417.08	1416.81	1417.31	1	128	2	1737.39	10.1	4984.43	1063.12
1420.08	1419.63	1420.38	1	168	2.64	2316.55	13.49	5649.96	5184.97
1422.09	1421.71	1422.34	1	165	2.59	1982.75	12.02	6592.97	2577.75
1423.1	1422.85	1423.45	1	146	2.29	1929.71	12.22	6531.11	1703.72
1424.14	1423.8	1424.55	1	227	3.56	2499.12	18.08	7412.03	3252.61
1425.12	1424.55	1425.54	1	169	2.65	3481.48	14.25	5854.86	3446.9
1428.14	1427.67	1428.46	1	206	3.24	2705.23	17.1	7404.63	6128
1430.13	1429.9	1430.42	1	258	4.05	2301.98	19.53	6915.94	1694.12
1431.13	1430.85	1431.36	1	166	2.6	1796.91	12.25	6357.8	1329.69
1432.18	1431.88	1432.41	1	374	5.87	3684.46	29.97	7921.95	5728.04
1433.18	1432.63	1433.63	1	307	4.81	4284.97	25.26	6837.86	2295.72
1435.16	1434.89	1435.44	1	215	3.37	2113.1	16.37	7006.45	2531.64
1436.17	1435.92	1436.53	1	249	3.9	2497.19	19.56	8030.77	2366.44
1439.08	1438.85	1439.46	1	216	3.38	2539.88	16.63	6748.08	4675.76
1443.3	1442.74	1443.6	1	155	2.43	2268.06	11.29	4563.3	2268.06
1446.18	1445.78	1446.41	1	351	5.5	3764.89	27.37	7363.01	9947.09
1449.16	1448.8	1449.37	1	193	3.02	1766.16	14.44	6995.59	2201.68
1450.15	1449.8	1450.33	1	252	3.95	2154.69	20.08	9259.26	2850.17
1451.15	1450.76	1451.39	1	384	6.03	2978.55	30.24	10748.5	4011.86
1452.15	1451.78	1452.45	1	342	5.36	3623.97	28.09	9308.29	4092.42
1454.13	1453.74	1454.43	1	151	2.38	1733.4	11.75	6373.59	1642.51
1455.12	1454.88	1455.58	1	137	2.16	2518.11	10.76	4049.04	4275.85
1456.14	1455.58	1456.54	1	144	2.27	2869.51	11.66	4984.84	2549.73
1457.17	1456.87	1457.48	1	379	5.94	4146.5	31.3	7160.83	6363.97
1459.17	1458.98	1459.37	1	353	5.54	2234.81	23.95	9702.54	1834.29
1460.19	1459.82	1460.47	1	519	8.15	4497.89	38.18	7969.26	9098.16
1462.16	1461.89	1462.44	1	196	3.07	2355.88	14.6	5992.01	1214.34
1463.18	1462.89	1463.49	1	175	2.75	2083.35	13.25	5801.75	2601.48
1464.13	1463.75	1464.49	1	134	2.11	2463.11	11.37	4350.43	2710.94
1466.16	1465.95	1466.46	1	190	2.98	1892.86	14.4	8943.25	1327.81
1469.19	1468.85	1469.38	1	157	2.47	1123.21	10.3	8862.72	1124.99
1472.12	1471.87	1472.4	1	155	2.43	1845.35	12.1	6797.96	3944.75
1474.15	1473.72	1474.48	1	188	2.94	2494.61	15.06	5859.4	1919.47
1477.16	1476.94	1477.49	1	140	2.19	1070.53	10.16	11771.3	928.24
1480.18	1479.88	1480.63	1	161	2.52	2231.79	13.38	7247.85	4105.32
1483.17	1482.9	1483.54	1	137	2.16	1980.48	11.45	5073.12	4317.16
1484.17	1483.97	1484.71	1	155	2.43	2229.99	11.55	6519.2	1387.73
1485.17	1484.71	1485.52	1	187	2.94	2728.62	15.52	7749.39	2203.47
1488.17	1487.92	1488.42	1	153	2.4	1472.85	10.96	6879.84	3018.5
1489.19	1488.73	1489.39	1	171	2.69	1787.53	13.21	9384.2	1180.01
1490.17	1489.66	1490.44	1	162	2.55	2543.47	12.97	6354.74	2192.38
1492.15	1491.75	1492.54	1	154	2.42	2363.6	12.69	6697.91	2633.4
1494.17	1493.82	1494.5	1	143	2.24	1495.67	10.67	7786.41	1779.77
1495.14	1494.79	1495.52	1	212	3.33	2266.71	15.78	7067.61	3689.99
1496.2	1495.91	1496.58	1	246	3.86	2879.48	17.88	6423.93	3155.9
1497.2	1496.81	1497.55	1	252	3.95	3523.25	19.74	4991.87	4321.19
1498.21	1497.78	1498.69	1	251	3.93	3418.4	19.76	5632.56	2731.09
1499.18	1498.69	1499.48	1	239	3.75	3188.17	18.4	6525.65	2408.73
1501.22	1500.96	1501.54	1	390	6.12	3568.04	29.32	8270.35	7522.47
1502.24	1501.87	1502.56	1	328	5.15	3684.93	26.03	8522.39	1936.65
1503.2	1502.75	1503.58	1	238	3.73	2811.45	17.27	6525.83	1742.55
1504.22	1503.85	1504.47	1	355	5.58	3550.1	28.06	8764.29	5643.45
1506.21	1505.8	1506.55	1	196	3.08	2261.51	13.54	6301.76	2442.22
1507.18	1506.72	1507.72	1	1788	28.05	16339.8	146.71	9519.55	39540.8
1510.19	1509.88	1510.47	1	485	7.61	4529.58	36.97	7684.15	4582.42
1512.18	1511.89	1512.51	1	318	4.98	3221.89	23.3	7835.41	4779.43
1513.26	1512.97	1513.57	1	471	7.39	5529.34	35.96	7215.73	8958.7
1516.22	1515.7	1516.58	1	431	6.76	4093.81	31.74	9834.4	8789.1
1517.22	1516.71	1517.63	1	1548	24.28	14761.8	125.81	9213.53	29764
1520.23	1519.82	1520.51	1	478	7.5	4779.87	37.1	9011.39	3850.84
1521.25	1520.76	1521.62	1	324	5.08	3340.57	24.11	9977.62	1939.55
1522.23	1521.93	1522.58	1	201	3.16	2399.63	15.38	6814.27	1599.79
1523.21	1522.94	1523.58	1	228	3.57	2387.11	16.39	8060.79	2979.25
1524.15	1523.94	1524.38	1	168	2.63	1940.93	11.2	7018.47	1325.45
1525.2	1524.69	1525.45	1	294	4.62	3257.66	20.57	7481.71	5701.67
1526.25	1525.95	1526.64	1	734	11.51	6084.86	54.69	9860.44	9832.19
1528.24	1527.88	1528.59	1	400	6.28	3892.22	27.53	6785.54	2471.36
1530.23	1530.06	1530.5	1	251	3.93	1996.92	12.86	8586.09	2049.27
1531.18	1530.77	1531.42	1	205	3.22	2011.97	10.89	6139.69	2189.79
1532.22	1531.93	1532.49	1	220	3.45	1955.99	11.18	6741.09	1761.44
1533.18	1532.72	1533.54	1	574	9.01	5560.94	42.07	8097.86	12043
1535.2	1534.76	1535.58	1	405	6.35	4514.97	29.28	7286.42	3294.72
1537.19	1536.88	1537.49	1	202	3.17	1727.09	11.88	6261.89	1382.58
1538.16	1537.87	1538.44	1	245	3.84	2293.14	15.06	7811.93	2272.96
1540.2	1539.7	1540.48	1	182	2.86	2378.79	12.86	5887.7	3024.84
1543.22	1543.09	1543.6	1	263	4.12	1340.61	10.87	11227.4	2859.03
1544.28	1543.79	1544.71	1	6309	98.95	56344.6	513.62	9504.66	145893
1548.25	1548	1548.53	1	419	6.57	3787.22	27.69	7331.36	2322.89
1549.25	1548.91	1549.65	1	219	3.44	2198.89	13.74	7070.44	1870.06
1550.18	1549.88	1550.47	1	337	5.29	2508.76	22.35	9116.36	3873.33
1551.19	1550.6	1551.42	1	353	5.54	3884.54	22.61	9547.21	5500.65
1552.17	1551.93	1552.52	1	566	8.89	4830.77	37.12	9531.79	5425.23
1554.15	1553.96	1554.53	1	301	4.72	2706.53	19.03	7947.3	3571.57
1555.2	1554.97	1555.8	1	224	3.52	3019.05	14.45	5925.66	3596.98
1557.22	1556.96	1557.56	1	144	2.25	2383.03	10.81	4597.01	3324.23
1558.27	1558.02	1558.61	1	203	3.18	1929.61	13.82	8707.61	964.83
1559.27	1558.8	1559.65	1	488	7.66	5134.61	38.04	8105.03	11664.8
1561.27	1560.94	1561.6	1	499	7.82	4944.83	38.48	9397.42	7178.81
1563.24	1563.02	1563.51	1	327	5.12	2830.33	24.08	7949.15	2681.04
1564.26	1563.95	1564.55	1	262	4.1	2756.57	19.14	8783.01	3148.59
1565.2	1564.95	1565.5	1	360	5.64	3743.94	27.5	7664.13	5540.81
1566.22	1565.8	1566.54	1	404	6.34	4092.83	30.63	8009.03	3630.65
1567.23	1566.88	1567.6	1	241	3.78	3396.03	17.93	5886.62	2005.05
1568.25	1567.86	1568.47	1	268	4.21	2832.09	18.79	6959.44	2597.68
1569.29	1568.92	1569.73	1	373	5.85	4051.4	28.27	9176.06	6325.97
1571.28	1570.87	1571.53	1	211	3.3	2395.98	15.48	7195.03	2023.88
1573.26	1572.98	1573.47	1	197	3.09	1729.73	13.52	7815.72	1015.28
1576.22	1575.79	1576.49	1	151	2.37	1796.81	10.07	5604.34	3023.96
1578.22	1578.02	1578.56	1	184	2.89	1774.98	11.77	7849.91	2444.78
1579.23	1578.98	1579.52	1	197	3.09	1964.66	13.07	6151.7	2158.22
1580.23	1579.81	1580.45	1	236	3.7	2539.43	17.29	6806.11	3486.35
1582.23	1582.01	1582.48	1	220	3.45	1700.4	13.8	6865.28	1104.78
1583.22	1582.91	1583.52	1	288	4.51	2781.85	19.52	6991.79	4864.48
1589.29	1588.95	1589.48	1	307	4.82	2869.6	21.45	8966.55	8039.37
1591.27	1590.83	1591.56	1	246	3.86	3207.62	17.85	6035.03	2078.64
1595.25	1594.9	1595.41	1	223	3.49	1466.07	11.87	11000.2	4123.99
1596.18	1595.9	1596.5	1	237	3.72	2389.51	13.7	4964.28	2720.96
1597.23	1596.87	1597.6	1	328	5.14	3320.79	18.77	6357.87	4536.21
1598.28	1597.75	1598.56	1	677	10.61	6551.31	47.51	8613.87	12130.1
1599.27	1598.93	1599.7	1	1690	26.51	15320.7	128.8	9206.78	29163
1600.2	1599.7	1600.64	1	3516	55.14	38485.5	279.43	7422.9	72131.6
1603.2	1602.92	1603.8	1	680	10.66	8005.1	50.63	7386.6	4211.9
1609.36	1609.04	1609.62	1	271	4.25	2246.43	18.26	7320.32	4751.73
1612.3	1612.05	1612.72	1	172	2.7	1452.03	11.22	12297.9	743.18
1614.23	1613.91	1614.6	1	182	2.86	1887.18	12.09	6726.24	4947.77
1615.3	1614.88	1615.65	1	296	4.65	3712.8	21.97	6221.21	5429.56
1616.24	1615.82	1616.62	1	391	6.13	5198.44	28.95	5208.61	6655.55
1618.23	1617.96	1618.59	1	385	6.04	4310.09	28.02	7070.14	5165.73
1619.22	1618.84	1619.53	1	330	5.17	3761.17	25.74	6952.13	2309.48
1621.26	1621	1621.59	1	300	4.71	2805.41	21.92	7830.97	5410.82
1622.26	1621.89	1622.64	1	345	5.42	4049.22	26.33	6910.83	5300.33
1624.27	1623.72	1624.57	1	281	4.41	3500.12	22.08	7560.24	3596.63
1626.29	1626.04	1626.88	1	183	2.87	2228.25	13.73	8651.01	1763.9
1630.27	1630.06	1630.58	1	170	2.67	1366.15	10.52	9491.96	3844.45
1631.3	1631.01	1631.51	1	262	4.11	1912.44	16.93	10178	1542.69
1632.27	1631.69	1632.53	1	652	10.22	6328.48	50.34	8527.76	14446.6
1635.28	1634.91	1635.7	1	346	5.43	3771.75	26.16	8877.56	6694.93
1637.25	1636.98	1637.63	1	308	4.83	2787.94	22.41	9920.41	3864.12
1639.26	1638.84	1639.58	1	175	2.75	1991.37	11.51	7691.18	2720.82
1640.28	1640.04	1640.6	1	225	3.54	1956.48	14.79	6377.38	1682.19
1641.26	1640.95	1641.51	1	235	3.69	2476.72	14.5	7220.85	3590.9
1643.32	1643.03	1643.69	1	392	6.15	3851.69	28.51	6785.3	7793.36
1644.35	1643.97	1644.58	1	546	8.57	4964.13	41.8	8651.57	4919.41
1645.35	1645.1	1645.93	1	473	7.42	4560.55	36.29	9991.63	3079.3
1648.29	1647.97	1648.54	1	214	3.36	2164.9	11.72	5545.31	4158.07
1649.26	1648.84	1649.67	1	247	3.87	3474.04	15.28	5018.84	3478.9
1652.3	1652.05	1652.72	1	172	2.69	1742.48	11.33	8964.02	3686.19
1653.3	1653.03	1653.55	1	240	3.77	1859.54	16.24	8350.1	1173.92
1654.32	1653.85	1654.71	1	324	5.08	3666.16	25.01	8000.11	7392.99
1656.28	1655.88	1656.8	1	259	4.06	3382.93	20.21	7631.18	4502.33
1657.26	1656.8	1657.83	1	260	4.08	3316.32	20.36	9068.97	2872.97
1659.28	1659.05	1659.68	1	173	2.72	2080.06	12.29	5548.09	2314.53
1660.31	1659.9	1660.67	1	267	4.18	3593.3	20.13	6766.8	7214.84
1662.33	1662.04	1662.66	1	388	6.09	3488.45	28.25	8479.34	3817.91
1664.29	1663.95	1664.56	1	200	3.14	2331.39	13.46	5833.93	3775.65
1666.29	1665.87	1666.51	1	194	3.04	2221.35	12.79	5560.17	3592.42
1667.29	1667.1	1667.73	1	190	2.98	2268.45	12.67	7435.17	1696.02
1668.3	1667.93	1668.67	1	253	3.97	3092.59	18.87	5771.41	5074.99
1669.35	1668.91	1669.64	1	353	5.54	3856.26	25.94	6945.32	4319.44
1670.33	1669.9	1670.62	1	361	5.67	4117.69	26.36	6652.09	4046.51
1671.32	1671	1671.68	1	260	4.08	3660.84	19.44	5909.14	2344.84
1673.33	1672.93	1673.61	1	272	4.26	2437.51	17.23	7864.55	4456.93
1674.28	1673.74	1674.62	1	456	7.15	6218.04	32.04	5792.09	13551.4
1677.33	1677.01	1677.67	1	300	4.7	3066.49	17.64	6314.64	3581.18
1681.31	1680.7	1681.58	1	211	3.31	3005.8	13.26	5612.58	8116.45
1684.32	1684.04	1684.59	1	217	3.41	1753.28	12.88	8150	1004.57
1686.33	1685.85	1686.71	1	210	3.29	2443.64	14.31	7251.67	5602.33
1689.28	1688.8	1689.61	1	214	3.36	2374.06	14	6857.59	5194.8
1691.35	1690.85	1691.75	1	1667	26.15	15994.6	129.67	9695.98	45424.6
1694.36	1693.89	1694.64	1	564	8.84	5822.31	40.99	8891.86	5238.45
1695.34	1694.98	1695.68	1	404	6.34	4474.07	27.56	8530.84	3670.29
1697.32	1697.12	1697.63	1	246	3.86	2137.27	12.69	7310.45	1509.79
1699.35	1699.13	1699.66	1	222	3.49	1517.28	11.52	7557.6	2788.6
1700.34	1700.08	1700.74	1	226	3.54	2312.12	14.44	6761.75	3472.16
1702.34	1701.94	1702.8	1	243	3.8	3152.78	16.37	7700.49	6090.5
1704.33	1704.08	1704.61	1	286	4.48	2712.38	19.47	6894.76	3915.81
1705.35	1705.08	1705.66	1	368	5.77	2666.14	24.08	8791.85	2203.92
1706.34	1706.1	1706.74	1	330	5.17	3747.88	21.25	7265.23	6288.61
1707.31	1706.94	1707.63	1	575	9.02	5046.51	39.91	8774.36	6309.75
1708.3	1707.96	1708.71	1	487	7.63	5162.37	31.38	8420.23	4138.49
1710.32	1710	1710.73	1	275	4.31	2818.34	16.84	6559.45	2513.2
1712.3	1712.06	1712.82	1	243	3.81	2517.89	15.3	5974.09	5508.64
1713.31	1712.82	1713.55	1	278	4.36	2846.84	15.86	7885.06	1922.21
1714.29	1713.84	1714.64	1	919	14.41	8538.09	68.39	9745.66	20162.2
1717.29	1716.99	1717.81	1	340	5.33	3810.6	24.09	7645.69	6050.96
1718.3	1717.97	1718.79	1	417	6.55	3988.59	30.53	7988.84	3969.4
1719.34	1719.06	1719.84	1	336	5.27	3507.51	23.68	7877.44	2138.58
1720.33	1720.04	1720.79	1	267	4.19	2785.42	17.95	8715.48	2028.88
1721.32	1720.79	1721.59	1	471	7.39	5093.78	33.7	8226.97	10813.3
1723.32	1722.91	1723.66	1	449	7.04	4864.76	31.57	7864.89	7140.42
1725.35	1725	1725.8	1	251	3.94	3466.08	17.72	5402.92	2792.08
1728.38	1727.99	1728.88	1	183	2.87	3084.08	13.2	3861.16	7283.84
1730.35	1729.99	1730.62	1	205	3.21	2238.2	12.78	7496.03	1327.85
1731.34	1731	1731.76	1	244	3.83	3020.02	17.53	7484.51	4833.2
1734.39	1734.01	1734.61	1	255	4	2288.6	14.29	8492.58	5305.05
1736.34	1736.11	1736.69	1	236	3.7	1899.83	14.74	7183.88	1822.6
1737.38	1737.03	1737.67	1	199	3.12	2368.53	11.18	5764.52	3721.98
1738.31	1737.94	1738.59	1	247	3.88	2717.04	14.31	9733.59	2653.92
1739.3	1738.9	1739.62	1	497	7.79	3945.41	28.33	9110.21	6462.94
1740.31	1739.87	1740.74	1	479	7.52	5732.84	29.26	6131.86	6648.25
1743.39	1743.13	1743.74	1	341	5.35	3337.15	22.36	6370.13	6408.14
1745.36	1745.08	1745.8	1	246	3.86	2933.93	16.07	5896.07	4166.77
1747.35	1747.03	1747.7	1	284	4.45	2459.29	18.84	9331.36	2938.38
1751.37	1751.05	1751.67	1	187	2.94	1735.48	10.16	5639.63	5176.78
1752.35	1752.12	1752.91	1	241	3.78	2652.77	16.36	6645.96	2514.06
1753.32	1752.91	1753.67	1	279	4.38	3139.18	19	7206.82	3689.64
1755.34	1754.91	1755.58	1	234	3.68	2226.33	11.82	7528.65	3378.12
1756.33	1755.74	1756.7	1	1867	29.29	19747.4	147.29	9566.37	50860.8
1759.34	1758.8	1759.83	1	581	9.11	6364.85	42.37	9007.84	3867.41
1760.4	1760.05	1760.84	1	467	7.33	5773.37	33.68	7316.68	7023.01
1764.38	1763.99	1764.85	1	368	5.77	4621.62	26.2	6965.69	12438.4
1767.4	1767.06	1767.94	1	208	3.27	2253.8	13.44	7210.44	3606.52
1769.37	1769.11	1769.63	1	215	3.37	1671.41	14.15	9267.72	1638.29
1770.39	1769.99	1770.67	1	183	2.87	2524.47	13.31	6083.49	4815.2
1772.35	1771.93	1772.68	1	300	4.7	3395.65	20.64	7303.36	6311.37
1773.36	1773.01	1773.71	1	331	5.19	3646.14	23.3	7601.99	2491.84
1774.36	1773.92	1774.73	1	300	4.71	3172.11	21.62	8421.55	2258.47
1776.38	1776.04	1776.67	1	215	3.37	2456.7	15.85	7626.88	4152.39
1778.37	1777.85	1778.82	1	299	4.69	3526.67	21.74	7639.46	7538.15
1780.41	1779.98	1780.61	1	235	3.69	2408.88	12.37	10278.5	1463.08
1781.43	1780.86	1781.76	1	1014	15.9	10805.2	79.79	8882.21	31874.1
1784.44	1784.1	1784.89	1	480	7.53	5086.37	34.8	7211.7	3776.75
1786.4	1786.07	1786.82	1	252	3.95	2837.31	16.3	6841.61	3843.12
1788.35	1788.08	1788.61	1	343	5.38	2619.44	23.75	10195	4360.32
1789.35	1789.13	1789.74	1	234	3.66	2726.43	14.17	5631.33	2084.1
1790.36	1789.94	1790.65	1	254	3.99	2656.43	16.6	7362.75	2153.87
1791.39	1791.06	1791.81	1	214	3.36	2697.57	15.44	8586.92	2055.7
1795.39	1794.92	1795.73	1	763	11.97	7299.08	60.18	10206.7	21547.7
1798.4	1798.08	1798.92	1	292	4.58	3595.03	20.81	6874.7	3412.85
1802.48	1801.94	1802.81	1	383	6	4699.86	28.4	6708.75	14513.8
1804.43	1803.9	1804.79	1	394	6.17	4976.48	26.61	5977.32	4968.26
1806.39	1806.04	1806.91	1	273	4.28	3267.56	19.95	6863.6	4078.29
1808.39	1807.91	1808.69	1	163	2.56	2156.42	11.21	4816.11	1828.67
1810.38	1810.08	1810.72	1	207	3.24	1932.25	14.99	8378.91	4106.22
1811.45	1811.08	1811.88	1	183	2.87	2197.57	13.4	6639.56	1541.26
1812.45	1812.09	1812.89	1	166	2.6	2111.25	11.32	6222.8	1930.53
1814.42	1814.14	1814.74	1	163	2.56	1685.7	10.44	7351	3124.46
1816.41	1815.92	1816.7	1	210	3.3	2843.12	15.47	8942.32	6203.66
1818.43	1818.16	1818.74	1	253	3.97	2457.19	16.47	5636.24	2812.65
1819.44	1818.94	1819.86	1	287	4.5	4000.41	20.09	6874.92	8021.77
1821.43	1821.09	1821.89	1	497	7.8	4784.64	37.68	10412.5	7009.69
1823.41	1823.04	1823.84	1	321	5.04	2811.03	23.54	10935.1	2396.28
1824.44	1824.16	1824.82	1	317	4.97	2548.61	21.44	10706.1	2931.05
1825.4	1825.01	1825.63	1	329	5.16	3210.59	23.23	8326.09	4756.03
1826.4	1825.97	1826.91	1	380	5.96	4275.06	28.08	7545.06	5082.45
1828.42	1828.17	1828.88	1	219	3.43	3018.82	14.7	5374.39	4084.11
1829.39	1829.04	1829.71	1	525	8.23	4346.8	37.94	10044.5	7545.22
1830.39	1830.01	1830.72	1	641	10.05	5810.24	47.99	9568.96	6489.62
1832.41	1832.03	1832.83	1	316	4.95	3860.48	22.58	7904.73	4305.85
1834.44	1834.07	1834.78	1	276	4.33	2557.49	19.59	8344.08	3991.69
1835.49	1835.15	1835.84	1	394	6.19	3977.64	27.92	6916.44	6983.72
1837.46	1837.12	1837.91	1	247	3.87	3043.2	16.37	6059.77	3177.57
1838.45	1838.16	1838.83	1	231	3.63	2439.37	15.58	7237.17	1454.84
1839.46	1839.12	1839.88	1	467	7.32	4325.24	35.68	9804.08	9492.72
1842.41	1842.09	1842.87	1	283	4.45	3040.17	20.33	7116.01	7022.76
1844.38	1843.84	1844.76	1	288	4.53	3791.81	20.69	6462.41	6055.21
1846.41	1845.96	1846.84	1	289	4.53	3139.17	20.14	8193.84	4085.15
1848.42	1848.2	1848.84	1	227	3.56	2545.13	16.06	6416.22	4115.98
1850.45	1850.18	1850.71	1	193	3.03	1570.49	11.88	7485.89	1553.48
1851.43	1851.1	1851.93	1	262	4.11	2691.78	18.9	8388.78	5641.46
1852.46	1851.93	1852.88	1	332	5.2	3484.83	25.04	8937.18	2637.55
1854.46	1854.13	1854.75	1	240	3.77	2028.12	16.56	8962.67	1545.26
1856.42	1856.09	1856.78	1	187	2.93	1946.73	12.83	6169.49	4361.21
1857.44	1857.13	1857.82	1	264	4.14	3074.24	19.84	7803.15	4407.95
1859.46	1859	1859.79	1	282	4.43	2870.64	21.53	10498.1	4391.19
1860.45	1860.18	1860.83	1	433	6.79	3845.69	31.62	8167.64	5602.77
1861.47	1861.24	1861.73	1	518	8.13	3935.65	35.45	8383.27	2658.16
1862.47	1862.05	1862.86	1	441	6.92	5034.06	34.39	8107.01	7661.96
1864.44	1864.02	1864.74	1	275	4.32	3088.4	20.51	7038.47	2752.31
1865.39	1864.95	1865.71	1	180	2.82	2325.87	12.56	5655.53	1480.8
1866.42	1866.06	1866.87	1	288	4.52	3750.25	22.34	7569.17	6763.29
1869.43	1869.14	1869.7	1	204	3.2	1699.28	14.67	9186.79	2955.83
1870.46	1870.07	1870.77	1	208	3.27	2509.42	16.11	7402.33	3329.2
1872.44	1872.02	1872.78	1	152	2.38	1915.26	11.05	5577.84	2406.77
1873.46	1873.18	1873.9	1	174	2.73	2150.99	12.48	6486.63	2694.42
1875.43	1875.24	1875.8	1	178	2.79	1464.98	11.19	10276.6	919.61
1876.43	1876.06	1876.85	1	170	2.66	2140.85	11.72	6092.62	2935.35
1878.44	1878.19	1878.78	1	242	3.79	2245.09	16.46	7217.72	3842.14
1879.41	1878.99	1879.78	1	257	4.03	2830.6	19.18	10523.6	3622.06
1880.43	1880.05	1880.82	1	388	6.09	3961.52	28.64	8077.86	6118.52
1881.45	1881.03	1881.85	1	422	6.62	5326.1	33.36	6964.69	5953.85
1883.46	1883.1	1883.89	1	343	5.38	3474.89	24.76	7156.46	3575.52
1884.46	1884.06	1884.73	1	277	4.35	3056.48	18.51	7844.28	2332.65
1886.45	1886.1	1886.76	1	150	2.36	2056.56	10.15	5687.81	1444.45
1889.45	1889.11	1889.81	1	168	2.63	1878.13	11.46	6409.28	5441.76
1891.49	1891.16	1892.07	1	587	9.2	6022.49	44.33	8246.45	17320.2
1893.48	1893.14	1893.89	1	724	11.36	7030.09	55.35	9060.4	10355.3
1896.47	1896.02	1896.72	1	378	5.92	3682.31	27.88	9789.49	5650.61
1900.45	1900.1	1900.69	1	183	2.87	1744.25	12.67	7553.86	2954.02
1902.45	1901.93	1902.93	1	178	2.79	2259.91	12.33	7895.08	4254.8
1904.42	1903.8	1904.83	1	292	4.58	4479.29	22.58	6791.89	8757.12
1907.48	1907.05	1907.69	1	279	4.38	2634.59	20.48	8980.48	4388.91
1909.45	1909.16	1909.75	1	189	2.96	2017.08	13.32	8355.88	2787.31
1911.46	1911.11	1911.83	1	243	3.81	2564.16	17.14	8922.34	4059.14
1914.49	1914.11	1914.86	1	166	2.61	1529.41	11.21	8756.83	2035.84
1916.55	1916.17	1916.85	1	174	2.74	2238.99	12.8	6971.75	5355.18
1917.51	1917.23	1917.89	1	253	3.97	2760	17.46	7202.31	1958.87
1919.53	1919.25	1919.88	1	205	3.22	1364.14	11.89	11596.5	695.78
1920.52	1920.1	1920.92	1	208	3.26	2215.3	14.22	7001.72	3522.47
1922.5	1921.98	1922.85	1	368	5.78	3913.52	24.41	6919.64	8514.78
1925.51	1925.17	1926.09	1	271	4.25	3285.52	18.77	8241.26	6655.25
1927.5	1927.08	1928.14	1	222	3.48	2915.95	15.25	8181.41	3818.5
1928.51	1928.14	1928.94	1	380	5.96	3689.25	28.62	9265.9	5368.65
1930.48	1930	1930.83	1	246	3.87	2828.3	17.66	6957.53	2969
1933.47	1933.14	1933.77	1	185	2.9	1870.65	11.08	6780.38	4002.35
1934.49	1934.22	1934.83	1	276	4.33	2357.8	18.71	8848.32	2483.7
1935.55	1935.21	1935.9	1	392	6.16	3646.24	28.47	9283.38	6493.17
1936.56	1935.9	1936.91	1	379	5.94	4056.36	26.83	9376.05	2698.93
1938.53	1938.23	1939.01	1	262	4.1	2694.81	17.53	7051.71	2432.84
1941.46	1941.16	1941.8	1	184	2.88	1745.41	10.9	5860.15	2317.77
1943.52	1943.24	1944.04	1	372	5.84	3460.24	26.27	8879.7	9430.3
1944.5	1944.04	1944.92	1	454	7.11	4550.37	32.43	9596.01	3307.97
1947.49	1946.93	1947.76	1	364	5.71	3763.22	23.7	8563.51	10925.1
1948.49	1948.02	1949.04	1	402	6.3	5340.44	28.96	8102.56	4681.69
1949.49	1949.04	1949.86	1	426	6.69	5207.43	30.84	7579.59	3553.78
1951.52	1951.26	1951.93	1	257	4.03	2645.01	15.74	7548.08	3005.34
1952.53	1952.21	1952.99	1	297	4.66	3316.29	20.25	7330.47	3733.96
1955.48	1955.01	1955.79	1	428	6.72	4056.59	28.87	8148.16	12347.4
1959.51	1959.18	1959.99	1	279	4.38	2717.41	15.28	8330.22	7485.45
1960.54	1960.23	1960.87	1	441	6.92	3769.49	26.43	7106.54	3441.81
1962.56	1962.1	1963.03	1	3242	50.85	30942.6	256.6	9644.43	100560
1965.53	1965.19	1965.98	1	2517	39.48	24233.4	189.79	8905.75	46319.7
1968.5	1968.16	1969.16	1	823	12.91	8218.77	55.79	9246.54	8236.44
1970.51	1970.14	1971	1	975	15.3	10078.3	72.03	8702.11	26376.4
1974.5	1974.21	1975	1	258	4.05	3341.61	16.35	5006.21	4128.42
1976.54	1976.12	1976.83	1	256	4.01	2248.57	16.2	7444.52	2313.62
1977.56	1977.21	1977.93	1	238	3.73	2094.2	15.29	8852.57	1770.48
1986.52	1986.21	1986.93	1	255	3.99	2296.14	16.76	8375.49	9186.91
1988.53	1988.22	1988.87	1	273	4.29	2946.86	19.24	7923.16	3028.43
1989.49	1989.18	1989.85	1	342	5.37	3018.73	23.53	9437.12	3747.2
1990.53	1990.06	1990.9	1	375	5.88	3959.96	27.55	7900.39	6317.46
1992.52	1992.05	1992.96	1	273	4.29	2972.63	18.43	8948.86	2613.65
1993.54	1993.22	1993.87	1	473	7.42	4310.87	33.91	10112.1	9346.51
1995.54	1995.16	1995.91	1	422	6.61	4282.08	29.26	7457.77	6148.97
1997.55	1997.08	1997.82	1	303	4.75	2966.79	20.24	8400.39	3026.19
1998.53	1998.18	1998.93	1	273	4.29	2415.82	18.9	11024.9	1396.19
1999.53	1999.19	2000.03	1	238	3.73	2519.38	15.87	8137.2	3744.44
2000.55	2000.22	2000.94	1	246	3.86	2596.3	17.64	6777.72	2111.09
2001.57	2001.28	2002.02	1	244	3.83	2389.33	17.35	8598.24	1857.98
2002.55	2002.31	2002.93	1	217	3.41	2022.4	14.84	8491.15	1431.84
2003.54	2003.1	2003.89	1	207	3.24	2149.81	14.13	6945.82	3176.37
2004.53	2004.13	2005	1	229	3.59	2679.8	16.62	7450.6	3582.45
2006.56	2006	2007.16	1	218	3.41	2785.98	15.78	7048.77	4954.79
2008.53	2008.21	2008.86	1	205	3.21	2125.48	14.88	7667.22	2094.75
2009.51	2009.2	2009.9	1	157	2.46	1725.75	11.04	5932.21	1061.27
2010.55	2010.19	2011.17	1	204	3.2	2676.44	15.4	6946.62	5181.96
2014.59	2014.23	2014.9	1	159	2.5	1586.4	10.94	7471.02	4044.46
2016.57	2016.18	2016.92	1	177	2.78	2202.34	12.39	6493.61	4326.88
2017.54	2017.19	2017.89	1	261	4.09	2505.34	19.35	8272.12	1910.38
2018.54	2018.18	2019.02	1	319	5.01	3283.46	24.97	9973.4	4159.36
2022.57	2022.37	2022.97	1	149	2.33	1567.41	10.47	8288.59	3280.25
2026.52	2026.16	2026.95	1	151	2.37	2097.21	10.03	5215.59	3781.69
2030.6	2030.21	2030.87	1	159	2.5	1398.31	10.96	8456.86	4280.47
2031.57	2031.16	2032	1	147	2.31	1975.61	10.42	7019.26	1571.89
2032.61	2032	2033.09	1	267	4.18	3265.96	21.47	7766.38	5005.44
2036.56	2036.31	2037.13	1	146	2.28	1649.55	10.68	8430.26	3673.85
2039.62	2039.31	2039.89	1	186	2.92	1804.1	13.67	7073.91	4044.23
2046.57	2046.17	2046.95	1	168	2.63	1550.54	11.61	8532.08	5651.33
2048.62	2048.16	2049.08	1	198	3.11	3073.26	14.85	6120.47	5101.72
2051.59	2051.19	2051.85	1	159	2.49	1917.87	10.66	8320.09	1200.66
2054.62	2054.38	2055.08	1	151	2.36	1774.8	10.12	7547.72	4863.97
2055.6	2055.08	2056.08	1	171	2.68	2448.33	12.99	6422.39	1319.32
2058.58	2058.1	2058.85	1	176	2.77	2271.87	13.38	8076.57	4279.52
2061.57	2061.26	2061.94	1	207	3.25	1549.5	14.69	11843.2	3000.01
2062.57	2062.31	2062.92	1	391	6.14	3784.1	30.58	8274.53	9895.84
2063.61	2063.18	2063.99	1	466	7.32	5137.23	38.19	8705	3931.81
2065.6	2065.33	2066.01	1	349	5.48	2698.79	25.98	11767.3	1663.49
2066.58	2066.25	2067.01	1	249	3.91	2740.26	17.52	7985.56	4747.65
2067.57	2067.25	2068.08	1	239	3.75	2793.64	16.97	7481.23	1617.92
2068.59	2068.3	2068.99	1	245	3.85	2484.41	17.65	7809.16	1578.27
2069.61	2069.25	2070.21	1	257	4.04	3100.13	20.75	8278.45	2808.89
2073.52	2072.94	2074.06	1	173	2.71	3032.63	12.67	6434.2	5083.12
2076.62	2076.19	2076.87	1	194	3.05	1910.2	12.91	7971.71	2101.49
2077.62	2077.14	2077.97	1	235	3.69	2695.77	17.4	6813.39	4582.38
2084.61	2084.28	2085.07	1	167	2.62	1887.44	11.21	12612.4	3435.44
2092.59	2092.25	2092.86	1	183	2.87	2002.08	10.77	6940.27	8347.5
2095.6	2095.29	2095.95	1	313	4.9	3257.11	23.29	7732.95	7676.17
2098.6	2098.26	2099.05	1	235	3.69	2823.39	16.33	8233.59	3998.99
2101.6	2101.21	2101.92	1	182	2.86	1555.49	11.47	8349.34	896.51
2108.64	2108.17	2108.98	1	208	3.26	2122.52	13.62	7837.56	8295.23
2113.61	2113.22	2114.09	1	219	3.44	1968.11	14.91	10754.5	6061.86
2115.63	2115.27	2115.96	1	204	3.19	2119.96	13.71	7275.92	1615.23
2116.68	2116.21	2117.05	1	261	4.09	2475.51	15.93	10878.2	4398.14
2117.73	2117.39	2118.23	1	1291	20.24	12319.4	103.14	9307.11	37948.8
2121.65	2121.34	2122.11	1	268	4.21	2811.21	16.74	5895.72	2522.06
2122.66	2122.33	2123.14	1	223	3.5	2177.92	13.48	8540.69	2637.81
2124.66	2124.43	2125.07	1	197	3.08	1415.92	11.17	10587.1	1682.84
2125.64	2125.32	2126.01	1	201	3.15	2155.59	13.31	7010.16	4901.03
2127.7	2127.3	2128.06	1	290	4.54	3244.42	20.65	8221.75	5531.37
2129.66	2129.33	2129.97	1	267	4.19	2596.28	18.21	6539.05	2828.27
2130.68	2130.17	2131.06	1	259	4.06	3008.84	17.27	6229.33	4468.61
2132.67	2132.35	2133.04	1	223	3.5	3011.94	14.07	4896.54	5382.38
2134.68	2134.25	2135.05	1	252	3.95	2689.67	16.62	7353.79	1381.62
2143.68	2143.18	2144.17	1	682	10.7	6441.2	55.01	10046.3	22002.6
2148.68	2148.32	2149.02	1	216	3.39	1940.08	12.25	5131.77	3783.39
2150.67	2150.19	2151.03	1	351	5.51	4252.3	21.19	7092.72	2939.72
2151.79	2151.31	2152.3	1	1948	30.55	20936.5	158.48	8726.45	69305.9
2156.72	2156.21	2157.08	1	207	3.25	2971.59	11.49	4769.95	4197.56
2157.64	2157.3	2157.95	1	250	3.93	2666.31	13.58	6290.16	1601.88
2158.62	2158.38	2159.2	1	238	3.73	2697.22	14.97	8728.23	7008.83
2174.69	2174.3	2175	1	282	4.42	2748.31	11.84	7447.77	11645.6
2175.6	2175	2176.05	1	2240	35.13	23622.9	176.66	9350.74	72233.4
2179.6	2179.23	2180.06	1	731	11.46	5992.84	49.63	9930.65	6855.67
2184.7	2184.31	2185.04	1	186	2.92	1636.18	10.83	7002	3754.35
2188.73	2188.23	2189.23	1	327	5.13	3080.98	23.39	10814.3	10906.7
2191.66	2191.21	2192.12	1	247	3.87	2690.71	16.63	6131.87	2737.14
2192.65	2192.12	2193.19	1	244	3.83	2547.46	16.62	6972.91	1887.98
2193.64	2193.19	2194.12	1	191	2.99	2065.51	12.21	7902.52	1366.34
2195.7	2195.43	2195.98	1	193	3.02	1489.89	11.99	7532.31	2309.06
2196.74	2196.44	2197.27	1	231	3.63	2383.76	15.08	7824.2	5586.3
2198.7	2198.27	2199.2	1	173	2.71	2312.14	12.2	5964.16	1566.36
2199.7	2199.2	2200.13	1	200	3.14	2432.7	14.81	7787.34	3739.34
2201.68	2201.39	2202.02	1	172	2.69	1991.58	11.38	5769.71	2165.29
2204.71	2204.36	2205.14	1	197	3.1	2216.92	13.64	10403.8	7050.87
2207.64	2207.16	2208.21	1	257	4.03	3813.64	19.51	6426.78	10541.1
2211.68	2211.44	2211.97	1	168	2.64	1637.11	10.22	7625.46	3438.6
2212.69	2212.17	2213.26	1	192	3.01	2216.93	12.55	6778.73	3207.2
2213.68	2213.26	2214.19	1	272	4.26	2840.78	19.2	7981.72	3421.88
2216.65	2216.23	2216.97	1	174	2.73	1389.05	11.34	9106.73	1509.15
2217.67	2217.24	2218.25	1	188	2.95	2347.84	13.01	8310.69	2819.99
2221.69	2221.29	2222.09	1	190	2.98	2018.29	13.34	8220.46	7209.97
2224.68	2224.09	2225.18	1	203	3.19	2572.37	14.7	6481	4003.62
2229.74	2229.3	2230.19	1	157	2.46	2124.25	11.78	8371.24	6063.56
2232.73	2232.29	2233.31	1	171	2.69	2764.62	12.21	5234.84	6477.94
2235.72	2235.31	2236.2	1	175	2.75	2241.84	12.82	6788.37	3316.58
2239.72	2239.44	2240.18	1	153	2.41	1918.92	10.72	6609.42	6786.68
2248.77	2248.46	2249.1	1	210	3.29	1927.53	13.18	8584.31	8128.58
2257.72	2257.4	2258.24	1	180	2.82	2219.01	12.15	7374.51	9086.81
2259.79	2259.36	2260.12	1	484	7.59	5589.5	35.96	8707.52	11049.3
2266.66	2266.19	2267.09	1	188	2.94	2401.76	13.73	6032.66	6734.49
2270.74	2270.36	2271.18	1	175	2.75	1917.84	11.67	7718.62	5003.15
2271.75	2271.41	2272.25	1	247	3.87	2762.54	17.83	10610.1	3273.63
2272.75	2272.25	2273.4	1	254	3.98	3243.28	19.88	9090.99	2164.31
2277.72	2277.31	2278.08	1	148	2.33	1914.63	10.11	7535.98	2497.26
2281.67	2281.36	2282.18	1	191	3	1927.82	12.84	9402.14	5378.85
2284.79	2284.33	2285.2	1	233	3.65	3133.57	15.2	5511.47	9493.59
2297.75	2297.24	2298.17	1	312	4.9	3823.58	24.02	8085.56	12997.4
2301.76	2301.3	2302.15	1	179	2.81	2160.08	12.09	4985.72	2385.64
2304.78	2304.29	2305.09	1	183	2.86	1797.23	10.9	7375.29	5155.96
2305.78	2305.29	2306.22	1	287	4.51	3288.12	19.85	10101	6743.14
2306.76	2306.22	2307.22	1	434	6.81	4757.78	32.06	9448.48	5799.53
2308.74	2308.2	2309.1	1	428	6.71	4281.11	30.73	8997.72	6709.27
2315.73	2315.45	2316.14	1	168	2.63	1367.16	10.57	10693.6	1330.39
2321.71	2321.18	2322.34	1	146	2.3	2141.77	10.06	5892.01	4504.35
2324.74	2324.41	2325.26	1	253	3.97	2499.81	17.78	8316.29	5109.06
2326.79	2326.35	2327.26	1	560	8.78	6381.89	43.68	8656.25	16633.9
2330.85	2330.41	2331.14	1	201	3.15	2078.25	12.03	7383.72	1778.24
2332.68	2332.38	2333.24	1	203	3.18	2120.7	12.18	6416.82	8724.33
2336.77	2336.4	2337.3	1	235	3.68	2376.56	15.82	9247.73	5157.77
2341.79	2341.45	2342.18	1	165	2.58	1524.03	10.14	8283.21	2887.89
2344.78	2344.36	2345.22	1	161	2.52	2322.42	10.75	5004.8	6787.66
2346.8	2346.36	2347.43	1	208	3.27	3016.01	14.3	5337.31	5141.13
2348.77	2348.23	2349.14	1	177	2.78	2232.67	11.95	6367.02	1871.02
2349.8	2349.14	2350.39	1	233	3.65	3359.9	17.22	6565.33	7865.65
2352.82	2352.34	2353.22	1	177	2.78	1868.11	11.26	8643.18	2169.45
2353.8	2353.48	2354.32	1	362	5.67	3775.13	27.31	9555.16	11148.8
2356.78	2356.22	2357.15	1	233	3.66	2813.08	16.26	7150.65	4439
2358.79	2358.27	2359.37	1	219	3.43	3265.77	15.29	7237.16	5446.89
2364.8	2364.4	2365.13	1	188	2.95	2065.14	13.05	8579.47	8623.04
2366.81	2366.2	2367.16	1	198	3.11	3180.98	15.07	6089.49	2584.53
2368.85	2368.28	2369.17	1	149	2.33	2005.52	10.16	5641.16	1057.83
2371.77	2371.55	2372.28	1	226	3.55	2435.43	16.97	9714.79	8064.58
2374.76	2374.45	2375.2	1	217	3.4	2289.2	15.73	7763	4169.17
2375.8	2375.2	2376.3	1	230	3.61	2951.51	17.19	7956.89	3428.08
2379.78	2379.33	2380.28	1	163	2.56	2283.18	11.59	8246.68	6237.93
2381.85	2381.4	2382.34	1	151	2.37	2876.95	11.14	3618.72	1450.01
2384.88	2384.36	2385.38	1	368	5.77	4068.29	27.22	9877.11	15224.1
2388.8	2388.55	2389.34	1	267	4.19	3006.78	17.92	10118.5	9338.45
2402.85	2402.36	2403.22	1	168	2.63	1772.56	12.04	10628.6	8232.8
2422.81	2422.43	2423.27	1	161	2.53	1779.64	11.11	7307.69	7467.76
2427.85	2427.58	2428.21	1	209	3.28	1770.26	13.92	8485.06	6890.27
2428.84	2428.21	2429.32	1	251	3.93	2746.33	17.94	9948.52	1943
2431.85	2431.41	2432.15	1	259	4.06	3141.91	15.31	8151.29	9381.35
2435.88	2435.59	2436.3	1	185	2.9	2085.58	10.68	8328.35	2453.02
2438.85	2438.47	2439.37	1	159	2.5	2101.85	10.88	6917.95	6402.35
2439.94	2439.37	2440.38	1	243	3.81	3540.16	17.41	7098.01	5121.5
2441.95	2441.52	2442.45	1	517	8.11	4818.91	37.42	9854.39	11289.4
2445.91	2445.52	2446.29	1	200	3.13	1901.17	12.71	6082.84	1820.99
2462.87	2462.47	2463.3	1	252	3.96	2843.85	18.44	7602.05	9305.34
2470.87	2470.41	2471.21	1	156	2.45	1564.68	10.34	7270.59	2369.38
2474.86	2474.49	2475.23	1	205	3.22	1703.69	11.77	7913.38	4403.62
2479.89	2479.4	2480.44	1	1461	22.91	16297.9	117.34	9234.21	73125.1
2483.89	2483.35	2484.45	1	646	10.13	6475.13	43.93	9643.62	4004.31
2484.84	2484.45	2485.38	1	420	6.59	4734.58	27.22	7418.3	2718.15
2490.9	2490.44	2491.35	1	217	3.41	2323.98	13.44	6651.05	9694.09
2493.9	2493.38	2494.4	1	419	6.57	4379.68	30.42	10174.3	13324.6
2495.89	2495.47	2496.3	1	426	6.68	4539.05	30.39	7986.85	3244.62
2497.95	2497.45	2498.42	1	255	4	3268.51	17.47	8462.87	5405.91
2506.91	2506.49	2507.54	1	197	3.09	2782.48	14.87	8564.05	9424.13
2520.98	2520.42	2521.44	1	156	2.45	1819.23	11.8	12608	1819.12
2535.83	2535.41	2536.44	1	203	3.19	2290.54	15.29	10609.5	2290.54
2581.97	2581.52	2582.31	1	145	2.28	1635.62	10.01	7957.68	7006.92
2586.95	2586.48	2587.27	1	145	2.28	1554.38	10.65	8642.84	4735.4
2601	2600.63	2601.48	1	130	2.05	1320.48	10.28	15713.4	4882.39
2626.01	2625.6	2626.62	1	182	2.86	2118.76	13.84	10473.4	2118.76
2641.99	2641.59	2642.45	1	229	3.6	2777.33	16.22	7468.31	10274
2653.97	2653.51	2654.53	1	180	2.83	2356.4	13.91	8479.45	7919.94
2678.03	2677.6	2678.54	1	210	3.29	1908.91	14.31	11125	9340.12
2682.06	2681.48	2682.46	1	187	2.94	2299.45	12.61	7989.62	3588.91
2693.1	2692.63	2693.55	1	179	2.81	2063.47	13.38	8426.99	4235.04
2703.04	2702.52	2703.49	1	162	2.55	2075.04	11.91	8829.08	9351.51
2717.03	2716.53	2717.54	1	282	4.43	3391.07	20.26	8554.15	12114.6
2730.06	2729.52	2730.52	1	421	6.6	4295.48	28.32	9076.57	23515.3
2734.1	2733.5	2734.42	1	317	4.97	2567.2	17.94	10525.2	1351.55
2777.99	2777.44	2778.48	1	674	10.57	8230.26	52.3	9168.95	36197.3
2798.29	2797.71	2798.73	1	246	3.86	3621.52	18.2	7959.57	15869.6
2830.27	2829.62	2830.79	1	451	7.08	6224.04	34.26	8910.66	23726.6
2852.14	2851.8	2852.6	1	176	2.76	2113.35	11.63	6563.14	10993.8
2856.19	2855.7	2856.53	1	224	3.51	2503.54	13.71	8198.28	7544.22
2857.17	2856.79	2857.7	1	369	5.78	3938.51	26.68	9093.23	5278.49
2870.14	2869.67	2870.62	1	301	4.71	3831.33	21.2	9249.5	19095.8

## Sheet: analysis after extraction
Centroid Mass	Lower Bound	Upper Bound	Charge (z)	Height	Relative Intensity	Area	S/N Ratio	Resolution	Isotope Cluster Area
1447.81	1447.6	1448.05	1	106	11.24	301.76	10.35	12604.1	301.76
1598.78	1598.56	1599.07	1	105	11.14	340.74	13.29	10735.4	340.74
1795.84	1795.52	1796.25	1	68	7.19	210.08	11.04	13761.9	210.08
1849.92	1849.55	1850.38	1	75	7.98	324.5	12.72	10295.2	324.5
2151.14	2150.65	2151.54	1	246	26.1	878.64	104.24	13390.7	3402.05
